# Supplementary material
Source: publisher figshare collection journal article supplement (https://gsajournals.figshare.com/articles/dataset/_/16908922)
Supplement: Supplementary file 2 [file 2]

## Supplementary Figure S1

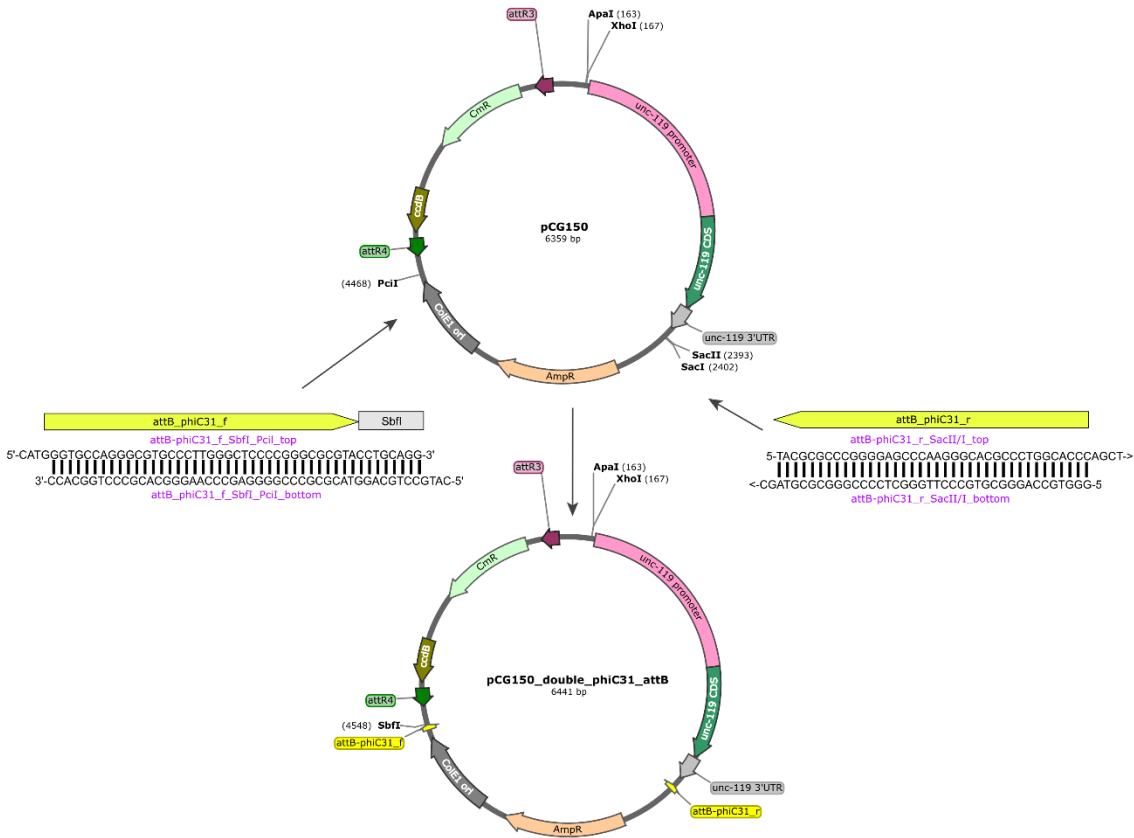

**Supplementary Figure S1. Construction of *pCG150\_double\_phiC31\_attB* plasmid.** *pCG150* was modified by inserting one phiC31 attB site just downstream the *unc-119* rescuing fragment and the other attB site plus a *SbfI* site close to the Gateway attR4 site. The two oligos, attB-phiC31\_f\_SbfI\_PciI\_top and attB-phiC31\_f\_SbfI\_PciI\_bottom, were annealed and inserted into the *PciI* site of *pCG150* at position 4468 (Merritt et al., 2008) to generate a forward phiC31 attB site followed by a *SbfI* site. Another two oligos, attB-phiC31\_r\_SacII/I\_top and attB-phiC31\_r\_SacII/I\_bottom, were annealed and inserted into the *SacII-SacI* section at position 2390 to generate the reverse direction attB site. Oligo sequences are in **Supplementary Table S3**. A construct intended to be inserted into the phiC31 attP landing site in the *C. elegans* genome could be put into *pCG150\_double\_phiC31\_attB* at the *SbfI/ApaI* sites by conventional cloning or at the R4-R3 site through Gateway cloning.
