# Supplementary material
Source: publisher figshare collection journal article supplement (https://gsajournals.figshare.com/articles/dataset/_/16908922)
Supplement: Supplementary file 5 [file 2]

Supplementary Figure S3

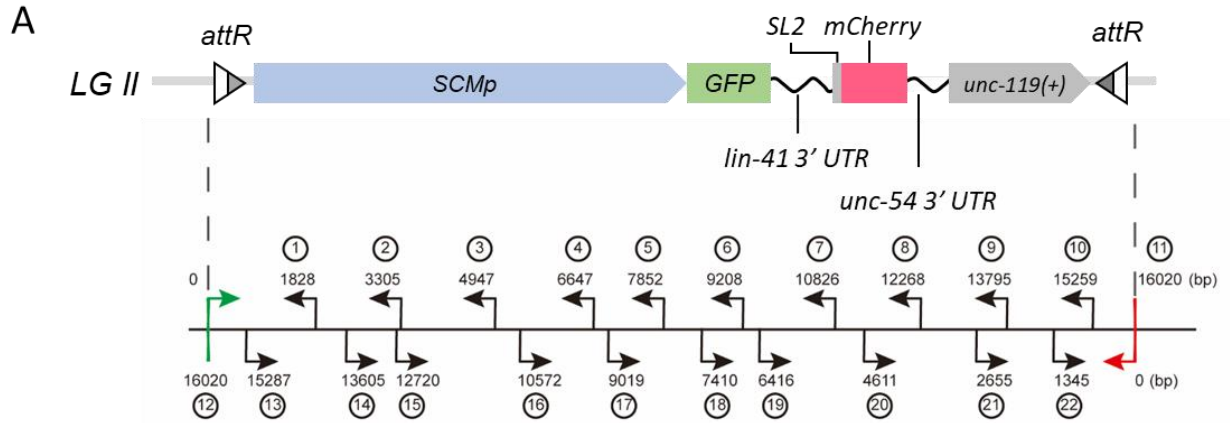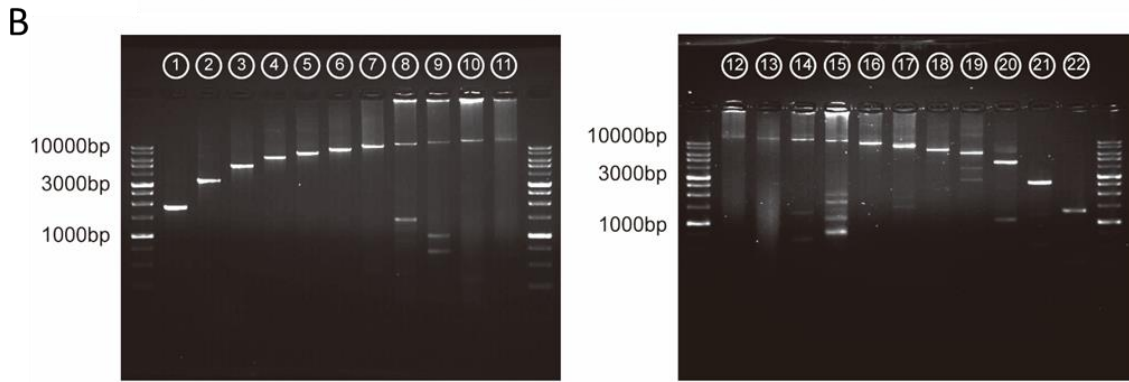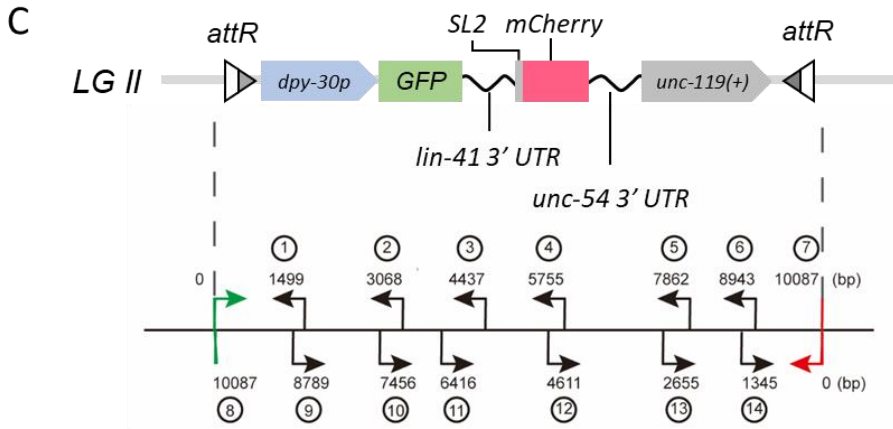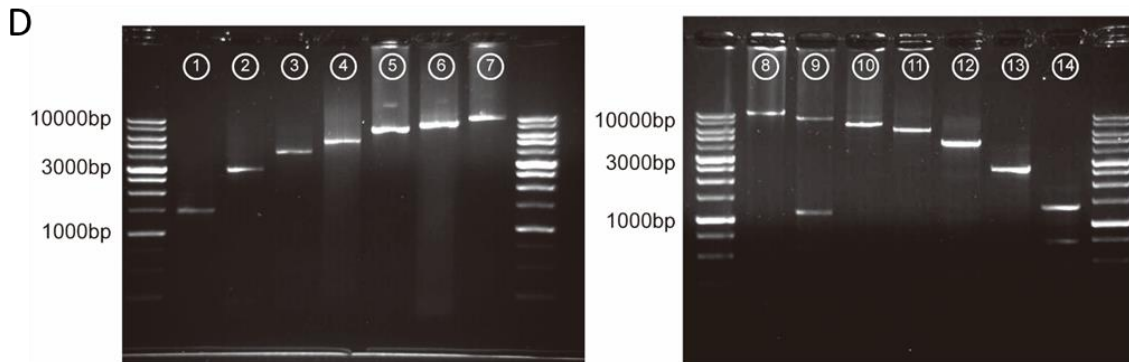

**Supplementary Figure S3. Ladder PCR of single-copy insertions of transgenes.** (A, C) Schematic of the primer sites within *chsIs001* (A) or *chsIs004* (C) after insertion into the BRC0566 landing pad strain. PCR primers are labeled by number. (B, D) PCR verification of inserted transgenes. Forward ladder PCR products are shown on the left and labeled by the number of the reverse primer. Reverse ladder PCR products are shown on the right and labeled by the number of the forward primer. The primer sequences are listed in **Supplementary Table S3**.
